# Supplementary material for: Significant prognostic values of aquaporin mRNA expression in breast cancer
Source: PubMed Central journal article supplement — Cancer Manag Res. 2019 Feb 14;11:1503–15. doi: 10.2147/CMAR.S193396 (PMC6388951; doi:10.2147/cmar.s193396), 2019-02-14
Supplement: CMAR-11-1503-193396.pdf [file CMAR-11-1503-193396.pdf]

**Supplementary Table 1. The relationship between the AQP family and the clinicopathological parameters of breast cancer. (bc-GenExMiner v4.1)**

| clinicopathological parameters | AQP1 |      |         | AQP2 |      |               | AQP3 |      |                   | AQP4 |      |                   | AQP5 |      |                   | AQP6 |      |         | AQP7 |      |                   |
|--------------------------------|------|------|---------|------|------|---------------|------|------|-------------------|------|------|-------------------|------|------|-------------------|------|------|---------|------|------|-------------------|
|                                | No.  | mRNA | P-value | No.  | mRNA | P-value       | No.  | mRNA | P-value           | No.  | mRNA | P-value           | No.  | mRNA | P-value           | No.  | mRNA | P-value | No.  | mRNA | P-value           |
| <b>Age</b>                     |      |      |         |      |      |               |      |      |                   |      |      |                   |      |      |                   |      |      |         |      |      |                   |
| ≤51                            | 1339 | -    | 0.5966  | 1358 | -    | 0.1461        | 1391 | ref  | <b>0.0014</b>     | 1392 | -    | 0.1975            | 1325 | -    | 0.9091            | 1267 | ref  | 0.0458  | 1523 | ref  | <b>&lt;0.0001</b> |
| >51                            | 1937 | -    |         | 2086 | -    |               | 2210 | ↑    |                   | 2210 | -    |                   | 2091 | -    |                   | 1771 | ↑    |         | 2329 | ↑    |                   |
| <b>Nodal status</b>            |      |      |         |      |      |               |      |      |                   |      |      |                   |      |      |                   |      |      |         |      |      |                   |
| negative                       | 2264 | ref  | 0.0189  | 2420 | ref  | <b>0.0076</b> | 2492 | ref  | <b>0.0092</b>     | 2493 | -    | 0.2270            | 2235 | -    | 0.2498            | 2334 | -    | 0.9206  | 2492 | ref  | <b>&lt;0.0001</b> |
| positive                       | 1346 | ↓    |         | 1484 | ↓    |               | 1562 | ↑    |                   | 1562 | -    |                   | 1345 | -    |                   | 1369 | -    |         | 1813 | ↓    |                   |
| <b>ER (IHC)</b>                |      |      |         |      |      |               |      |      |                   |      |      |                   |      |      |                   |      |      |         |      |      |                   |
| negative                       | 1425 | -    | 0.9600  | 1525 | -    | 0.5347        | 1558 | ref  | <b>&lt;0.0001</b> | 1446 | ref  | <b>&lt;0.0001</b> | 1425 | ref  | <b>&lt;0.0001</b> | 1408 | -    | 0.8782  | 1503 | ref  | 0.0131            |
| positive                       | 3514 | -    |         | 3864 | -    |               | 3988 | ↓    |                   | 3766 | ↓    |                   | 3643 | ↓    |                   | 3591 | -    |         | 3946 | ↑    |                   |
| <b>PR (IHC)</b>                |      |      |         |      |      |               |      |      |                   |      |      |                   |      |      |                   |      |      |         |      |      |                   |
| negative                       | 917  | -    | 0.9724  | 936  | -    | 0.1201        | 946  | ref  | 0.0338            | 804  | ref  | 0.0186            | 946  | ref  | <b>&lt;0.0001</b> | 859  | -    | 0.9016  | 934  | -    | 0.3796            |
| positive                       | 1325 | -    |         | 1390 | -    |               | 1439 | ↓    |                   | 1249 | ↓    |                   | 1439 | ↓    |                   | 1247 | -    |         | 1355 | -    |                   |
| <b>HER2(IHC)</b>               |      |      |         |      |      |               |      |      |                   |      |      |                   |      |      |                   |      |      |         |      |      |                   |
| negative                       | 1409 | -    | 0.2410  | 1357 | -    | 0.4656        | 1409 | -    | 0.6437            | 1409 | ref  | 0.0399            | 1409 | -    | 0.5824            | 1369 | -    | 0.8211  | 1596 | ref  | <b>0.0007</b>     |
| positive                       | 201  | -    |         | 198  | -    |               | 201  | -    |                   | 201  | ↓    |                   | 201  | -    |                   | 192  | -    |         | 217  | ↓    |                   |
| <b>Triple-negative status</b>  |      |      |         |      |      |               |      |      |                   |      |      |                   |      |      |                   |      |      |         |      |      |                   |
| Not                            | 3617 | -    | 0.2564  | 4040 | -    | 0.1062        | 4099 | -    | 0.4017            | 3857 | ref  | <b>0.0002</b>     | 3754 | ref  | <b>&lt;0.0001</b> | 3751 | -    | 0.2722  | 4044 | ref  | <b>0.0010</b>     |
| TNBC                           | 374  | -    |         | 374  | -    |               | 374  | -    |                   | 374  | ↑    |                   | 374  | ↑    |                   | 362  | -    |         | 417  | ↓    |                   |

**Supplementary Table 1. Continued**

| clinicopathological parameters | AQP8 |      |         | AQP9 |      |                   | AQP10 |      |         | AQP11 |      |                   | AQP12A |      |         | AQP12B |      |               |
|--------------------------------|------|------|---------|------|------|-------------------|-------|------|---------|-------|------|-------------------|--------|------|---------|--------|------|---------------|
|                                | No.  | mRNA | P-value | No.  | mRNA | P-value           | No.   | mRNA | P-value | No.   | mRNA | P-value           | No.    | mRNA | P-value | No.    | mRNA | P-value       |
| <b>Age</b>                     |      |      |         |      |      |                   |       |      |         |       |      |                   |        |      |         |        |      |               |
| ≤51                            | 1361 | -    | 0.1773  | 1361 | ref  | <b>0.0023</b>     | 646   | -    | 0.5638  | 790   | ref  | <b>&lt;0.0001</b> | 224    | -    | 0.5717  | 98     | -    | 0.0731        |
| >51                            | 2142 | -    |         | 2142 | ↑    |                   | 1024  | -    |         | 1443  | ↑    |                   | 451    | -    |         | 259    | -    |               |
| <b>Nodal status</b>            |      |      |         |      |      |                   |       |      |         |       |      |                   |        |      |         |        |      |               |
| negative                       | 2447 | -    | 0.8487  | 2447 | -    | 0.1005            | 580   | -    | 0.7283  | 1110  | -    | 0.0705            | 231    | -    | 0.0642  | 116    | ref  | <b>0.0029</b> |
| positive                       | 1509 | -    |         | 1509 | -    |                   | 662   | -    |         | 972   | -    |                   | 236    | -    |         | 64     | ↑    |               |
| <b>ER (IHC)</b>                |      |      |         |      |      |                   |       |      |         |       |      |                   |        |      |         |        |      |               |
| negative                       | 1412 | -    | 0.2730  | 1412 | ref  | <b>&lt;0.0001</b> | 725   | -    | 0.9818  | 913   | ref  | <b>&lt;0.0001</b> | 227    | -    | 0.5158  | 148    | -    | 0.5895        |
| positive                       | 3701 | -    |         | 3701 | ↓    |                   | 1356  | -    |         | 2174  | ↑    |                   | 444    | -    |         | 206    | -    |               |
| <b>PR (IHC)</b>                |      |      |         |      |      |                   |       |      |         |       |      |                   |        |      |         |        |      |               |
| negative                       | 804  | ref  | 0.0488  | 804  | ref  | <b>&lt;0.0001</b> | 585   | -    | 0.9293  | 596   | ref  | <b>&lt;0.0001</b> | 133    | -    | 0.0560  |        |      |               |
| positive                       | 1249 | ↑    |         | 1249 | ↓    |                   | 725   | -    |         | 846   | ↑    |                   | 152    | -    |         |        |      |               |
| <b>HER2(IHC)</b>               |      |      |         |      |      |                   |       |      |         |       |      |                   |        |      |         |        |      |               |
| negative                       | 1409 | -    | 0.4196  | 1409 | -    | 0.0884            | 619   | -    | 0.1091  | 619   | -    | 0.1174            | 163    | -    | 0.6090  |        |      |               |
| positive                       | 201  | -    |         | 201  | -    |                   | 157   | -    |         | 157   | -    |                   | 35     | -    |         |        |      |               |
| <b>Triple-negative status</b>  |      |      |         |      |      |                   |       |      |         |       |      |                   |        |      |         |        |      |               |
| Not                            | 3857 | -    | 0.4170  | 3857 | ref  | <b>&lt;0.0001</b> | 1476  | -    | 0.3352  | 2304  | ref  | <b>&lt;0.0001</b> | 470    | -    | 0.3362  | 206    | -    | 0.5007        |
| TNBC                           | 374  | -    |         | 374  | ↑    |                   | 197   | -    |         | 197   | ↓    |                   | 30     | -    |         | 51     | -    |               |

All the data of the AQP family were based on bc-GenExMiner v4.1.

“No.” means the patients’ number from database. “ref” means take this part as reference. Some datapoints were empty due to limited samples.

ER, estrogen receptor; PR, progesterone receptor; HER2, human epidermal growth factor receptor 2; TNBC, Triple-negative breast cancer

The data with statistical significance (P<0.01) were marked in bold text.

**Supplementary Table 2. The results of Dunnett-Tukey-Kramer' s test for pairwise comparison in Scarff Bloom & Richardson grade (SBR) criterion and Nottingham Prognostic Index (NPI) criterion.**

| Gene  | Pairwise comparison of SBR | P-value | Pairwise comparison of NPI | P-value |
|-------|----------------------------|---------|----------------------------|---------|
| AQP1  | SBR 2 < SBR 1              | <0.0001 | NPI 2 < NPI 1              | <0.0001 |
|       | SBR 3 < SBR 1              | <0.0001 | NPI 3 < NPI 1              | <0.10   |
|       | SBR 3 < SBR 2              | <0.0001 | NPI 3 = NPI 2              | >0.10   |
| AQP5  | SBR 2 = SBR 1              | >0.10   | NPI 2 > NPI 1              | <0.001  |
|       | SBR 3 > SBR 1              | <0.0001 | NPI 3 > NPI 1              | <0.10   |
|       | SBR 3 > SBR 2              | <0.0001 | NPI 3 = NPI 2              | >0.10   |
| AQP7  | SBR 2 < SBR 1              | <0.10   | NPI 2 < NPI 1              | <0.0001 |
|       | SBR 3 < SBR 1              | <0.0001 | NPI 3 < NPI 1              | <0.001  |
|       | SBR 3 < SBR 2              | <0.0001 | NPI 3 = NPI 2              | >0.10   |
| AQP8  | SBR 2 = SBR 1              | >0.10   |                            |         |
|       | SBR 3 = SBR 1              | >0.10   |                            |         |
|       | SBR 3 > SBR 2              | <0.05   |                            |         |
| AQP9  | SBR 2 > SBR 1              | <0.0001 | NPI 2 > NPI 1              | <0.0001 |
|       | SBR 3 > SBR 1              | <0.0001 | NPI 3 = NPI 1              | >0.10   |
|       | SBR 3 > SBR 2              | <0.0001 | NPI 3 < NPI 2              | <0.10   |
| AQP11 | SBR 2 = SBR 1              | >0.10   | NPI 2 < NPI 1              | <0.001  |
|       | SBR 3 < SBR 1              | <0.0001 | NPI 3 = NPI 1              | >0.10   |
|       | SBR 3 < SBR 2              | <0.0001 | NPI 3 = NPI 2              | >0.10   |

**Supplementary Table 3. Survival analyses of the AQP family in all breast cancer.**

| Gene        | Affymetrix ID | Survival outcome | HR        | 95%CI     | P-value        |
|-------------|---------------|------------------|-----------|-----------|----------------|
| <b>AQP0</b> | 220863_at     | RFS              | 0.75      | 0.67-0.84 | <b>3.2e-07</b> |
|             |               | OS               | 1.06      | 0.86-1.31 | 0.59           |
|             |               | DMFS             | 1.01      | 0.84-1.23 | 0.89           |
|             |               | PPS              | 1.09      | 0.85-1.38 | 0.51           |
| <b>AQP1</b> | 207542_s_at   | RFS              | 0.7       | 0.63-0.79 | 3.2e-10        |
|             |               | OS               | 0.75      | 0.61-0.93 | <b>0.0082</b>  |
|             |               | DMFS             | 0.83      | 0.68-1.01 | 0.057          |
|             |               | PPS              | 0.88      | 0.69-1.12 | 0.29           |
|             | 209047_at     | RFS              | 0.69      | 0.62-0.77 | <b>5.7e-11</b> |
|             |               | OS               | 0.68      | 0.55-0.84 | <b>0.00036</b> |
|             |               | DMFS             | 0.81      | 0.67-0.99 | 0.035          |
| <b>AQP2</b> | 206672_at     | PPS              | 0.89      | 0.7-1.13  | 0.34           |
|             |               | RFS              | 0.7       | 0.63-0.78 | <b>1.6e-10</b> |
|             |               | OS               | 0.91      | 0.74-1.13 | 0.39           |
|             |               | DMFS             | 0.99      | 0.82-1.2  | 0.92           |
|             | 236630_at     | PPS              | 0.85      | 0.67-1.09 | 0.19           |
| RFS         |               | 0.96             | 0.83-1.13 | 0.64      |                |
| OS          |               | 1.33             | 0.97-1.82 | 0.073     |                |
|             |               | DMFS             | 1.53      | 1.1-2.12  | 0.011          |

|             |             |      |      |           |                |
|-------------|-------------|------|------|-----------|----------------|
|             |             | PPS  | 1.15 | 0.81-1.65 | 0.43           |
|             | 240285_at   | RFS  | 0.79 | 0.68-0.93 | <b>0.0038</b>  |
|             |             | OS   | 1.04 | 0.76-1.42 | 0.82           |
|             |             | DMFS | 0.61 | 0.43-0.86 | <b>0.0044</b>  |
| <b>AQP3</b> | 203747_at   | PPS  | 1.01 | 0.71-1.44 | 0.96           |
|             |             | RFS  | 0.85 | 0.76-0.95 | <b>0.0037</b>  |
|             |             | OS   | 0.99 | 0.8-1.23  | 0.93           |
|             | 39248_at    | DMFS | 1.02 | 0.84-1.24 | 0.83           |
|             |             | PPS  | 1.02 | 0.8-1.3   | 0.85           |
|             |             | RFS  | 1.24 | 1.11-1.38 | <b>0.00011</b> |
| <b>AQP4</b> | 39249_at    | OS   | 1.21 | 0.98-1.5  | 0.077          |
|             |             | DMFS | 1.14 | 0.94-1.38 | 0.2            |
|             |             | PPS  | 1.31 | 1.02-1.67 | 0.031          |
|             | 210066_s_at | RFS  | 1.08 | 0.97-1.21 | 0.16           |
|             |             | OS   | 1.09 | 0.88-1.35 | 0.44           |
|             |             | DMFS | 1.05 | 0.87-1.28 | 0.6            |
| <b>AQP5</b> | 210067_at   | PPS  | 1.15 | 0.9-1.47  | 0.25           |
|             |             | RFS  | 1.01 | 0.91-1.13 | 0.85           |
|             |             | OS   | 1.02 | 0.82-1.26 | 0.87           |
|             | 210068_s_at | DMFS | 1.11 | 0.92-1.35 | 0.27           |
|             |             | PPS  | 0.97 | 0.76-1.23 | 0.78           |
|             |             | RFS  | 0.84 | 0.75-0.93 | <b>0.0015</b>  |
| <b>AQP6</b> | 210906_x_at | OS   | 0.99 | 0.8-1.22  | 0.91           |
|             |             | DMFS | 0.92 | 0.76-1.12 | 0.41           |
|             |             | PPS  | 1.17 | 0.92-1.49 | 0.21           |
|             | 226228_at   | RFS  | 0.86 | 0.77-0.96 | <b>0.0054</b>  |
|             |             | OS   | 1.01 | 0.81-1.24 | 0.96           |
|             |             | DMFS | 1.08 | 0.89-1.31 | 0.45           |
| <b>AQP5</b> | 213611_at   | PPS  | 0.88 | 0.69-1.13 | 0.32           |
|             |             | RFS  | 0.83 | 0.75-0.93 | <b>0.00096</b> |
|             |             | OS   | 1.01 | 0.82-1.25 | 0.92           |
|             | 208435_s_at | DMFS | 0.93 | 0.77-1.13 | 0.48           |
|             |             | PPS  | 0.91 | 0.72-1.16 | 0.46           |
|             |             | RFS  | 0.91 | 0.78-1.06 | 0.24           |
| <b>AQP5</b> | 213611_at   | OS   | 1.37 | 1-1.88    | 0.049          |
|             |             | DMFS | 0.95 | 0.69-1.31 | 0.75           |
|             |             | PPS  | 1.67 | 1.17-2.39 | <b>0.0047</b>  |
|             | 208435_s_at | RFS  | 0.91 | 0.82-1.02 | 0.092          |
|             |             | OS   | 1.12 | 0.9-1.38  | 0.31           |
|             |             | DMFS | 0.97 | 0.8-1.17  | 0.74           |
| <b>AQP6</b> | 208435_s_at | PPS  | 1.11 | 0.87-1.42 | 0.38           |
|             |             | RFS  | 0.83 | 0.74-0.92 | <b>0.00064</b> |
|             |             | OS   | 1.15 | 0.93-1.42 | 0.2            |
|             |             | DMFS | 1.13 | 0.93-1.37 | 0.23           |

|              |              |      |      |           |                  |
|--------------|--------------|------|------|-----------|------------------|
|              |              | PPS  | 0.98 | 0.77-1.25 | 0.88             |
|              | 216219_at    | RFS  | 0.8  | 0.72-0.9  | <b>7.8e-05</b>   |
|              |              | OS   | 0.96 | 0.78-1.19 | 0.72             |
|              |              | DMFS | 1.15 | 0.95-1.39 | 0.16             |
|              |              | PPS  | 1.08 | 0.84-1.37 | 0.56             |
| <b>AQP7</b>  | 206955_at    | RFS  | 0.9  | 0.81-1    | 0.06             |
|              |              | OS   | 0.83 | 0.67-1.03 | 0.098            |
|              |              | DMFS | 0.96 | 0.79-1.17 | 0.71             |
|              |              | PPS  | 1.08 | 0.85-1.38 | 0.52             |
| <b>AQP8</b>  | 206784_at    | RFS  | 0.75 | 0.67-0.83 | <b>1.8e-07</b>   |
|              |              | OS   | 0.93 | 0.75-1.15 | 0.48             |
|              |              | DMFS | 1.06 | 0.87-1.28 | 0.58             |
|              |              | PPS  | 0.84 | 0.65-1.07 | 0.15             |
| <b>AQP9</b>  | 205568_at    | RFS  | 1.61 | 1.45-1.8  | <b>&lt;1E-16</b> |
|              |              | OS   | 1.62 | 1.31-2.01 | <b>9.1e-06</b>   |
|              |              | DMFS | 1.54 | 1.26-1.87 | <b>1.4e-05</b>   |
|              |              | PPS  | 1.18 | 0.93-1.51 | 0.18             |
| <b>AQP10</b> | 1555338_s_at | RFS  | 0.78 | 0.66-0.91 | <b>0.0015</b>    |
|              |              | OS   | 1.33 | 0.97-1.82 | 0.071            |
|              |              | DMFS | 0.92 | 0.67-1.28 | 0.64             |
|              |              | PPS  | 1.46 | 1.02-2.08 | 0.037            |
| <b>AQP11</b> | 229526_at    | RFS  | 0.71 | 0.61-0.83 | <b>1.7e-05</b>   |
|              |              | OS   | 0.77 | 0.56-1.05 | 0.097            |
|              |              | DMFS | 0.74 | 0.54-1.03 | 0.075            |
|              |              | PPS  | 0.75 | 0.53-1.07 | 0.11             |

HR, hazard ratio; CI, confidence interval; OS, overall survival; RFS, relapse free survival; DMFS, distant metastasis free survival; PPS, post progression survival.

All of the data above were obtained from the Kaplan-Meier Plotter database.

The data with statistical significance (P<0.01) were marked in bold text.

#### Supplementary Table 4. Survival analyses of the AQP family with different lymph node status in breast cancer.

| Gene        | Affymetrix ID | Survival outcome | Lymph node positive |           |                | Lymph node negative |           |               |
|-------------|---------------|------------------|---------------------|-----------|----------------|---------------------|-----------|---------------|
|             |               |                  | HR                  | 95%CI     | P-value        | HR                  | 95%CI     | P-value       |
| <b>AQP0</b> | 220863_at     | RFS              | 1.06                | 0.87-1.29 | 0.57           | 0.97                | 0.82-1.15 | 0.71          |
|             |               | OS               | 1.26                | 0.86-1.86 | 0.24           | 0.81                | 0.56-1.17 | 0.27          |
|             |               | DMFS             | 1.13                | 0.77-1.66 | 0.53           | 0.93                | 0.71-1.22 | 0.59          |
|             |               | PPS              | 1.79                | 1.14-2.8  | <b>0.01</b>    | 0.79                | 0.52-1.21 | 0.28          |
| <b>AQP1</b> | 207542_s_at   | RFS              | 0.69                | 0.56-0.84 | <b>0.00018</b> | 0.8                 | 0.67-0.95 | <b>0.0088</b> |
|             |               | OS               | 0.89                | 0.61-1.32 | 0.57           | 0.91                | 0.63-1.32 | 0.62          |
|             |               | DMFS             | 0.79                | 0.54-1.16 | 0.23           | 0.89                | 0.68-1.16 | 0.38          |
|             |               | PPS              | 1.19                | 0.76-1.86 | 0.45           | 1.01                | 0.66-1.56 | 0.95          |
|             | 209047_at     | RFS              | 0.8                 | 0.66-0.98 | 0.027          | 0.76                | 0.64-0.9  | <b>0.0012</b> |
| OS          |               | 1.13             | 0.77-1.67           | 0.53      | 0.82           | 0.57-1.19           | 0.3       |               |

|             |             |      |      |           |               |      |            |                |
|-------------|-------------|------|------|-----------|---------------|------|------------|----------------|
|             |             | DMFS | 1.03 | 0.7-1.51  | 0.89          | 0.73 | 0.55-0.96  | 0.023          |
|             |             | PPS  | 1.59 | 1.01-2.49 | 0.043         | 0.92 | 0.6-1.41   | 0.7            |
| <b>AQP2</b> | 206672_at   | RFS  | 1.06 | 0.87-1.29 | 0.55          | 1.02 | 0.86-1.2   | 0.86           |
|             |             | OS   | 1.27 | 0.86-1.88 | 0.22          | 0.62 | 0.42-0.92  | 0.016          |
|             |             | DMFS | 1.09 | 0.74-1.6  | 0.67          | 1.08 | 0.82-1.42  | 0.58           |
|             |             | PPS  | 1.89 | 1.2-2.97  | <b>0.005</b>  | 0.48 | 0.31-0.74  | <b>0.00075</b> |
|             | 236630_at   | RFS  | 0.95 | 0.74-1.22 | 0.67          | 1.17 | 0.79-1.71  | 0.43           |
|             |             | OS   | 1.46 | 0.86-2.49 | 0.16          | 0.52 | 0.2-1.31   | 0.16           |
|             |             | DMFS | 1.25 | 0.67-2.32 | 0.48          | 0.89 | 0.38-2.09  | 0.78           |
|             |             | PPS  | 1.31 | 0.71-2.43 | 0.38          | 1.07 | 0.36-3.23  | 0.9            |
|             | 240285_at   | RFS  | 0.89 | 0.69-1.15 | 0.37          | 0.73 | 0.5-1.08   | 0.12           |
|             |             | OS   | 2.21 | 1.29-3.76 | <b>0.0029</b> | 0.54 | 0.22-1.35  | 0.18           |
|             |             | DMFS | 0.79 | 0.42-1.47 | 0.45          | 0.53 | 0.21-1.31  | 0.16           |
|             |             | PPS  | 2.17 | 1.16-4.05 | 0.013         | 0.38 | 0.11-1.31  | 0.11           |
| <b>AQP3</b> | 203747_at   | RFS  | 0.97 | 0.8-1.18  | 0.74          | 0.94 | 0.79-1.11  | 0.45           |
|             |             | OS   | 1.38 | 0.93-2.03 | 0.11          | 0.91 | 0.63-1.33  | 0.64           |
|             |             | DMFS | 1.18 | 0.8-1.74  | 0.39          | 0.82 | 0.62-1.08  | 0.15           |
|             |             | PPS  | 1.83 | 1.16-2.88 | <b>0.0078</b> | 0.84 | 0.55-1.29  | 0.43           |
|             | 39248_at    | RFS  | 1.17 | 0.96-1.42 | 0.12          | 1.08 | 0.91-1.28  | 0.36           |
|             |             | OS   | 1.32 | 0.89-1.94 | 0.16          | 1.31 | 0.9-1.9    | 0.15           |
|             |             | DMFS | 1.16 | 0.78-1.7  | 0.46          | 0.96 | 0.73-1.26  | 0.78           |
|             |             | PPS  | 1.32 | 0.85-2.07 | 0.22          | 1.74 | 1.13-2.69  | 0.012          |
|             | 39249_at    | RFS  | 1.05 | 0.86-1.28 | 0.62          | 1.05 | 0.89-1.24  | 0.56           |
|             |             | OS   | 1.05 | 0.71-1.54 | 0.81          | 1.26 | 0.87-1.82  | 0.23           |
|             |             | DMFS | 1.06 | 0.72-1.56 | 0.76          | 0.96 | 0.73-1.25  | 0.74           |
|             |             | PPS  | 1.18 | 0.75-1.85 | 0.47          | 1.26 | 0.82-1.94  | 0.28           |
| <b>AQP4</b> | 210066_s_at | RFS  | 1.07 | 0.88-1.3  | 0.5           | 1.04 | 0.88-1.24  | 0.62           |
|             |             | OS   | 0.76 | 0.51-1.12 | 0.16          | 1.03 | 0.71-1.49  | 0.89           |
|             |             | DMFS | 1.29 | 0.88-1.9  | 0.19          | 1.04 | 0.79-1.37  | 0.77           |
|             |             | PPS  | 0.6  | 0.38-0.95 | 0.026         | 1.05 | 0.68-1.61  | 0.83           |
|             | 210067_at   | RFS  | 1.05 | 0.87-1.28 | 0.59          | 0.86 | 0.73-1.02  | 0.09           |
|             |             | OS   | 1.19 | 0.8-1.75  | 0.39          | 1.04 | 0.72-1.52  | 0.82           |
|             |             | DMFS | 1.02 | 0.69-1.5  | 0.91          | 1.02 | 0.78-1.34  | 0.89           |
|             |             | PPS  | 1.51 | 0.97-2.38 | 0.069         | 1.39 | 0.9-2.13   | 0.14           |
|             | 210068_s_at | RFS  | 1.01 | 0.83-1.23 | 0.93          | 1.12 | 0.95-1.33  | 0.19           |
|             |             | OS   | 1.17 | 0.8-1.73  | 0.42          | 1.14 | 0.79-1.65  | 0.5            |
|             |             | DMFS | 1.15 | 0.78-1.7  | 0.47          | 1.28 | 0.97-1.68  | 0.075          |
|             |             | PPS  | 1.67 | 1.06-2.62 | 0.024         | 0.87 | 1.57-1.33  | 0.53           |
|             | 210906_x_at | RFS  | 0.97 | 0.79-1.18 | 0.73          | 0.93 | 0.79-1.1   | 0.41           |
|             |             | OS   | 1.25 | 0.85-1.85 | 0.25          | 1.01 | 0.7-1.46   | 0.96           |
|             |             | DMFS | 1.25 | 0.85-1.84 | 0.25          | 0.86 | 0.66-1.13  | 0.28           |
|             |             | PPS  | 1.69 | 1.07-2.64 | 0.022         | 0.8  | 0.52-1.22  | 0.3            |
|             | 226228_at   | RFS  | 0.89 | 0.69-1.14 | 0.35          | 0.91 | 0.62-1.34  | 0.64           |
|             |             | OS   | 1.79 | 1.05-3.07 | 0.031         | 4.05 | 1.34-12.23 | <b>0.0072</b>  |

|              |              |      |      |           |                |      |           |                |
|--------------|--------------|------|------|-----------|----------------|------|-----------|----------------|
|              |              | DMFS | 0.82 | 0.44-1.52 | 0.52           | 1    | 0.42-2.36 | 0.99           |
|              |              | PPS  | 1.61 | 0.86-3.01 | 0.13           | 1.78 | 0.57-5.53 | 0.32           |
| <b>AQP5</b>  | 213611_at    | RFS  | 0.92 | 0.76-1.12 | 0.42           | 0.97 | 0.82-1.15 | 0.75           |
|              |              | OS   | 0.89 | 0.6-1.31  | 0.55           | 1.04 | 0.72-1.51 | 0.82           |
|              |              | DMFS | 1.06 | 0.72-1.56 | 0.76           | 0.85 | 0.65-1.11 | 0.24           |
|              |              | PPS  | 1.04 | 0.66-1.62 | 0.87           | 1.19 | 0.78-1.82 | 0.43           |
| <b>AQP6</b>  | 208435_s_at  | RFS  | 1.09 | 0.89-1.32 | 0.41           | 1.02 | 0.86-1.21 | 0.83           |
|              |              | OS   | 1.33 | 0.9-1.96  | 0.15           | 1.27 | 0.88-1.84 | 0.2            |
|              |              | DMFS | 1.13 | 0.77-1.66 | 0.54           | 1.27 | 0.97-1.67 | 0.079          |
|              |              | PPS  | 1.88 | 1.2-2.94  | <b>0.0053</b>  | 1.21 | 0.79-1.86 | 0.38           |
|              | 216219_at    | RFS  | 1.19 | 0.98-1.45 | 0.083          | 1.14 | 0.96-1.35 | 0.13           |
|              |              | OS   | 1.3  | 0.88-1.92 | 0.18           | 0.86 | 0.59-1.25 | 0.42           |
|              |              | DMFS | 1.42 | 0.96-2.11 | 0.074          | 1.3  | 0.99-1.7  | 0.06           |
|              |              | PPS  | 1.68 | 1.07-2.64 | 0.022          | 0.89 | 0.58-1.36 | 0.59           |
| <b>AQP7</b>  | 206955_at    | RFS  | 0.85 | 0.7-1.03  | 0.097          | 0.96 | 0.81-1.13 | 0.61           |
|              |              | OS   | 0.87 | 0.59-1.28 | 0.47           | 0.81 | 0.56-1.18 | 0.28           |
|              |              | DMFS | 1.07 | 0.73-1.57 | 0.75           | 1    | 0.76-1.31 | 1              |
|              |              | PPS  | 1.15 | 0.74-1.8  | 0.54           | 1.05 | 0.68-1.61 | 0.83           |
| <b>AQP8</b>  | 206784_at    | RFS  | 1.07 | 0.88-1.31 | 0.48           | 1.01 | 0.86-1.2  | 0.87           |
|              |              | OS   | 1.24 | 0.84-1.83 | 0.28           | 0.73 | 0.5-1.06  | 0.1            |
|              |              | DMFS | 1.42 | 0.96-2.1  | 0.078          | 1.04 | 0.79-1.36 | 0.77           |
|              |              | PPS  | 2.07 | 1.32-3.26 | <b>0.0013</b>  | 0.64 | 0.41-0.98 | 0.038          |
| <b>AQP9</b>  | 205568_at    | RFS  | 1.51 | 1.24-1.84 | <b>3.6e-05</b> | 1.48 | 1.25-1.75 | <b>4.9e-06</b> |
|              |              | OS   | 1.24 | 0.84-1.83 | 0.27           | 1.93 | 1.32-2.81 | <b>0.00053</b> |
|              |              | DMFS | 1.35 | 0.92-2    | 0.12           | 1.57 | 1.19-2.06 | <b>0.0011</b>  |
|              |              | PPS  | 1.2  | 0.76-1.87 | 0.43           | 1.21 | 0.79-1.85 | 0.39           |
| <b>AQP10</b> | 1555338_s_at | RFS  | 0.93 | 0.72-1.19 | 0.55           | 0.9  | 0.61-1.33 | 0.59           |
|              |              | OS   | 1.85 | 1.07-3.18 | 0.024          | 1.02 | 0.41-2.52 | 0.96           |
|              |              | DMFS | 0.87 | 0.47-1.61 | 0.65           | 0.81 | 0.33-1.96 | 0.64           |
|              |              | PPS  | 2.98 | 1.56-5.67 | <b>0.00054</b> | 1.28 | 0.41-4    | 0.67           |
| <b>AQP11</b> | 229526_at    | RFS  | 0.71 | 0.55-0.91 | <b>0.0072</b>  | 0.99 | 0.67-1.45 | 0.94           |
|              |              | OS   | 0.81 | 0.48-1.37 | 0.42           | 0.59 | 0.24-1.48 | 0.26           |
|              |              | DMFS | 0.68 | 0.37-1.27 | 0.22           | 0.93 | 0.39-2.18 | 0.86           |
|              |              | PPS  | 1.13 | 0.61-2.11 | 0.7            | 1.57 | 0.52-4.74 | 0.42           |

HR, hazard ratio; CI, confidence interval; OS, overall survival; RFS, relapse free survival; DMFS, distant metastasis free survival; PPS, post progression survival.

All of the data above were obtained from the Kaplan-Meier Plotter database.

The data with statistical significance ( $P < 0.01$ ) were marked in bold text.

### Supplementary Table 5. Survival analyses of the AQP family with different histological grades in breast cancer.

| Gene        | Affymetrix ID | Survival outcome | Grade I          |         | Grade II         |         | Grade III        |         |
|-------------|---------------|------------------|------------------|---------|------------------|---------|------------------|---------|
|             |               |                  | HR (95% CI)      | p-value | HR (95% CI)      | p-value | HR (95% CI)      | p-value |
| <b>AQP0</b> | 220863_at     | RFS              | 1.15 (0.68-1.94) | 0.6     | 0.85 (0.67-1.09) | 0.2     | 0.88 (0.71-1.09) | 0.24    |

|             |             |      |                   |               |                  |       |                  |       |
|-------------|-------------|------|-------------------|---------------|------------------|-------|------------------|-------|
|             |             | OS   | 0.75 (0.31-1.86)  | 0.54          | 1.05 (0.68-1.61) | 0.82  | 0.95 (0.68-1.31) | 0.75  |
|             |             | DMFS | 1.66 (0.71-3.89)  | 0.24          | 0.87 (0.62-1.22) | 0.42  | 0.95 (0.67-1.34) | 0.75  |
|             |             | PPS  | 1.09 (0.4-2.94)   | 0.87          | 1.28 (0.79-2.08) | 0.32  | 1.14 (0.77-1.67) | 0.52  |
| <b>AQP1</b> | 207542_s_at | RFS  | 0.76 (0.45-1.28)  | 0.31          | 0.76 (0.59-0.96) | 0.022 | 0.94 (0.76-1.17) | 0.58  |
|             |             | OS   | 0.97 (0.4-2.34)   | 0.95          | 0.7 (0.45-1.07)  | 0.098 | 1.07 (0.77-1.49) | 0.68  |
|             |             | DMFS | 0.67 (0.29-1.55)  | 0.35          | 0.8 (0.57-1.13)  | 0.21  | 1.07 (0.76-1.51) | 0.71  |
|             |             | PPS  | 1.09 (0.41-2.94)  | 0.86          | 0.81 (0.5-1.31)  | 0.38  | 1.16 (0.79-1.7)  | 0.44  |
|             | 209047_at   | RFS  | 0.47 (0.27-0.81)  | <b>0.0054</b> | 0.88 (0.69-1.11) | 0.28  | 0.97 (0.78-1.2)  | 0.78  |
|             |             | OS   | 0.48 (0.19-1.21)  | 0.11          | 0.82 (0.53-1.25) | 0.36  | 1.07 (0.77-1.49) | 0.68  |
|             |             | DMFS | 0.56 (0.24-1.29)  | 0.17          | 1.1 (0.78-1.54)  | 0.6   | 1.02 (0.72-1.44) | 0.9   |
|             |             | PPS  | 0.56 (0.2-1.57)   | 0.27          | 0.98 (0.6-1.59)  | 0.94  | 1.1 (0.75-1.62)  | 0.62  |
| <b>AQP2</b> | 206672_at   | RFS  | 1.1 (0.65-1.85)   | 0.72          | 0.88 (0.69-1.12) | 0.29  | 0.9 (0.72-1.11)  | 0.33  |
|             |             | OS   | 1.14 (0.44-2.96)  | 0.78          | 0.83 (0.54-1.29) | 0.42  | 0.89 (0.64-1.23) | 0.47  |
|             |             | DMFS | 1.95 (0.81-4.65)  | 0.13          | 1.06 (0.75-1.5)  | 0.73  | 0.82 (0.58-1.15) | 0.25  |
|             |             | PPS  | 1.18 (0.43-3.22)  | 0.75          | 1.63 (1-2.66)    | 0.048 | 0.95 (0.64-1.39) | 0.77  |
|             | 236630_at   | RFS  | 0.77 (0.27-2.21)  | 0.62          | 0.97 (0.59-1.61) | 0.91  | 1.22 (0.89-1.66) | 0.22  |
|             |             | OS   | 1.58 (0.14-18.29) | 0.71          | 0.98 (0.31-3.06) | 0.97  | 1.18 (0.71-1.96) | 0.53  |
|             |             | DMFS |                   |               | 0.99 (0.36-2.72) | 0.98  | 1.36 (0.76-2.43) | 0.29  |
|             |             | PPS  |                   |               |                  |       | 1 (0.56-1.8)     | 1     |
|             | 240285_at   | RFS  | 0.6 (0.2-1.8)     | 0.36          | 0.73 (0.44-1.21) | 0.22  | 0.86 (0.63-1.17) | 0.34  |
|             |             | OS   | 0.45 (0.04-5.62)  | 0.53          | 1.22 (0.39-3.85) | 0.74  | 1.55 (0.93-2.59) | 0.09  |
|             |             | DMFS |                   |               | 0.86 (0.31-2.37) | 0.77  | 0.53 (0.29-0.98) | 0.039 |
|             |             | PPS  |                   |               |                  |       | 1.57 (0.86-2.84) | 0.14  |
| <b>AQP3</b> | 203747_at   | RFS  | 1.12 (0.66-1.88)  | 0.68          | 0.95 (0.75-1.21) | 0.69  | 0.89 (0.72-1.11) | 0.31  |
|             |             | OS   | 1.88 (0.7-5.1)    | 0.20          | 1.25 (0.81-1.91) | 0.31  | 0.94 (0.68-1.3)  | 0.71  |
|             |             | DMFS | 0.99 (0.42-2.33)  | 0.98          | 1.07 (0.76-1.52) | 0.69  | 1.16 (0.82-1.64) | 0.4   |
|             |             | PPS  | 1.35 (0.5-3.66)   | 0.55          | 1.39 (0.86-2.26) | 0.18  | 1.03 (0.7-1.5)   | 0.9   |
|             | 39248_at    | RFS  | 1.38 (0.82-2.34)  | 0.23          | 1.02 (0.8-1.29)  | 0.88  | 1.31 (1.06-1.63) | 0.014 |
|             |             | OS   | 1.75 (0.67-4.52)  | 0.25          | 1.4 (0.91-2.15)  | 0.12  | 1.25 (0.9-1.74)  | 0.18  |
|             |             | DMFS | 0.66 (0.28-1.59)  | 0.35          | 1.24 (0.88-1.75) | 0.23  | 1.45 (1.02-2.06) | 0.035 |
|             |             | PPS  | 0.8 (0.3-2.14)    | 0.65          | 1.4 (0.86-2.29)  | 0.17  | 1.34 (0.91-1.96) | 0.13  |
|             | 39249_at    | RFS  | 0.92 (0.54-1.54)  | 0.74          | 0.93 (0.73-1.18) | 0.54  | 1.07 (0.86-1.33) | 0.55  |
|             |             | OS   | 2.13 (0.79-5.7)   | 0.12          | 1.14 (0.75-1.75) | 0.53  | 1.17 (0.85-1.63) | 0.34  |
|             |             | DMFS | 0.77 (0.33-1.8)   | 0.54          | 1.12 (0.8-1.59)  | 0.51  | 1.32 (0.93-1.86) | 0.12  |
|             |             | PPS  | 1.99 (0.72-5.51)  | 0.18          | 1.14 (0.7-1.86)  | 0.59  | 1.09 (0.74-1.59) | 0.66  |
| <b>AQP4</b> | 210066_s_at | RFS  | 1.45 (0.86-2.46)  | 0.16          | 1.01 (0.8-1.29)  | 0.9   | 1.06 (0.85-1.32) | 0.61  |
|             |             | OS   | 0.4 (0.14-1.13)   | 0.073         | 1.4 (0.91-2.15)  | 0.12  | 0.9 (0.65-1.25)  | 0.54  |
|             |             | DMFS | 1.5 (0.64-3.52)   | 0.35          | 1.08 (0.76-1.52) | 0.68  | 1.03 (0.73-1.46) | 0.85  |
|             |             | PPS  | 0.48 (0.17-1.33)  | 0.15          | 1.42 (0.87-2.31) | 0.16  | 0.97 (0.66-1.43) | 0.86  |
|             | 210067_at   | RFS  | 1.13 (0.68-1.9)   | 0.64          | 1.1 (0.87-1.4)   | 0.43  | 0.86 (0.69-1.08) | 0.2   |
|             |             | OS   | 0.67 (0.24-1.84)  | 0.43          | 1.26 (0.83-1.94) | 0.28  | 0.97 (0.7-1.34)  | 0.84  |
|             |             | DMFS | 0.59 (0.25-1.39)  | 0.22          | 1.17 (0.83-1.65) | 0.37  | 0.99 (0.7-1.41)  | 0.96  |
|             |             | PPS  | 2.03 (0.75-5.5)   | 0.16          | 1 (0.61-1.64)    | 0.99  | 1.42 (0.97-2.09) | 0.87  |
|             | 210068_s_at | RFS  | 1.04 (0.62-1.74)  | 0.89          | 1.12 (0.88-1.42) | 0.35  | 1.1 (0.88-1.36)  | 0.4   |

|              |              |      |                   |               |                   |                |                  |               |
|--------------|--------------|------|-------------------|---------------|-------------------|----------------|------------------|---------------|
|              |              | OS   | 0.75 (0.29-1.96)  | 0.56          | 1.34 (0.87-2.05)  | 0.18           | 1.14 (0.82-1.59) | 0.43          |
|              |              | DMFS | 1.31 (0.57-2.97)  | 0.52          | 1.21 (0.86-1.71)  | 0.28           | 1.6 (1.12-2.27)  | <b>0.0086</b> |
|              |              | PPS  | 0.47 (0.16-1.36)  | 0.16          | 1.41 (0.87-2.29)  | 0.16           | 1.26 (0.86-1.84) | 0.23          |
|              | 210906_x_at  | RFS  | 1.44 (0.85-2.43)  | 0.17          | 0.99 (0.78-1.26)  | 0.97           | 0.96 (0.77-1.2)  | 0.74          |
|              |              | OS   | 0.95 (0.38-2.33)  | 0.9           | 1.27 (0.83-1.94)  | 0.27           | 1.07 (0.77-1.48) | 0.7           |
|              |              | DMFS | 1.65 (0.72-3.79)  | 0.24          | 0.81 (0.57-1.15)  | 0.24           | 1.14 (0.81-1.61) | 0.45          |
|              |              | PPS  | 0.4 (0.13-1.22)   | 0.098         | 1.37 (0.84-2.22)  | 0.2            | 1.2 (0.82-1.75)  | 0.35          |
|              | 226228_at    | RFS  | 2.02 (0.68-6.04)  | 0.2           | 1.02 (0.62-1.7)   | 0.93           | 0.83 (0.61-1.13) | 0.24          |
|              |              | OS   | 0.6 (0.05-6.69)   | 0.68          | 3.22 (0.87-11.91) | 0.064          | 1.39 (0.84-2.32) | 0.2           |
|              |              | DMFS |                   |               | 0.67 (0.24-1.9)   | 0.45           | 0.82 (0.46-1.46) | 0.5           |
|              |              | PPS  |                   |               |                   |                | 2.07 (1.12-3.8)  | 0.017         |
| <b>AQP5</b>  | 213611_at    | RFS  | 0.96 (0.57-1.62)  | 0.88          | 0.97 (0.76-1.23)  | 0.8            | 0.89 (0.71-1.1)  | 0.28          |
|              |              | OS   | 1.71 (0.69-4.2)   | 0.24          | 1.22 (0.8-1.87)   | 0.35           | 0.8 (0.58-1.12)  | 0.19          |
|              |              | DMFS | 0.63 (0.26-1.51)  | 0.3           | 1.08 (0.77-1.52)  | 0.66           | 1.01 (0.71-1.43) | 0.95          |
|              |              | PPS  | 1.44 (0.53-3.91)  | 0.47          | 1.09 (0.67-1.77)  | 0.73           | 1.02 (0.7-1.5)   | 0.91          |
| <b>AQP6</b>  | 208435_s_at  | RFS  | 1.83 (1.07-3.13)  | 0.025         | 0.92 (0.73-1.18)  | 0.52           | 0.87 (0.7-1.08)  | 0.22          |
|              |              | OS   | 0.88 (0.36-2.13)  | 0.78          | 1.71 (1.11-2.64)  | 0.015          | 1.1 (0.79-1.53)  | 0.56          |
|              |              | DMFS | 2.09 (0.88-4.96)  | 0.086         | 1.12 (0.79-1.57)  | 0.53           | 1.18 (0.84-1.67) | 0.34          |
|              |              | PPS  | 1 (0.37-2.67)     | 0.99          | 1.82 (1.1-3.02)   | 0.018          | 1.07 (0.73-1.57) | 0.73          |
|              | 216219_at    | RFS  | 1.33 (0.79-2.24)  | 0.29          | 1.05 (0.83-1.34)  | 0.67           | 1.01 (0.81-1.25) | 0.96          |
|              |              | OS   | 1.42 (0.54-3.73)  | 0.48          | 1.18 (0.76-1.81)  | 0.46           | 1.01 (0.73-1.4)  | 0.95          |
|              |              | DMFS | 2.02 (0.87-4.66)  | 0.094         | 1.42 (1.01-2.02)  | 0.045          | 0.95 (0.67-1.35) | 0.79          |
|              |              | PPS  | 0.8 (0.3-2.15)    | 0.65          | 1.95 (1.19-3.2)   | <b>0.0074</b>  | 1.04 (0.71-1.53) | 0.83          |
| <b>AQP7</b>  | 206955_at    | RFS  | 0.62 (0.36-1.05)  | 0.072         | 1.23 (0.96-1.56)  | 0.096          | 0.87 (0.7-1.09)  | 0.22          |
|              |              | OS   | 0.27 (0.1-0.75)   | <b>0.0071</b> | 0.91 (0.6-1.4)    | 0.68           | 1.14 (0.82-1.57) | 0.45          |
|              |              | DMFS | 0.4 (0.16-0.97)   | 0.037         | 1.45 (1.02-2.06)  | 0.037          | 1.01 (0.71-1.42) | 0.97          |
|              |              | PPS  | 0.33 (0.11-1.04)  | 0.047         | 1.05 (0.64-1.7)   | 0.86           | 1.21 (0.83-1.77) | 0.32          |
| <b>AQP8</b>  | 206784_at    | RFS  | 0.98 (0.58-1.66)  | 0.95          | 1.09 (0.85-1.38)  | 0.5            | 0.96 (0.78-1.2)  | 0.75          |
|              |              | OS   | 0.82 (0.34-1.99)  | 0.66          | 0.92 (0.6-1.41)   | 0.69           | 0.98 (0.71-1.36) | 0.9           |
|              |              | DMFS | 2.32 (0.95-5.65)  | 0.057         | 1.09 (0.77-1.53)  | 0.64           | 1.11 (0.78-1.57) | 0.57          |
|              |              | PPS  | 1.1 (0.41-2.97)   | 0.85          | 1.34 (0.83-2.18)  | 0.23           | 1.08 (0.74-1.57) | 0.71          |
| <b>AQP9</b>  | 205568_at    | RFS  | 1.85 (1.09-3.13)  | 0.021         | 1.77 (1.39-2.27)  | <b>3.2e-06</b> | 1.03 (0.83-1.28) | 0.8           |
|              |              | OS   | 2.15 (0.84-5.49)  | 0.1           | 1.51 (0.98-2.32)  | 0.058          | 0.98 (0.7-1.35)  | 0.88          |
|              |              | DMFS | 1.93 (0.83-4.46)  | 0.12          | 1.69 (1.19-2.41)  | <b>0.0031</b>  | 1.15 (0.81-1.62) | 0.44          |
|              |              | PPS  | 3.17 (1.14-8.87)  | 0.021         | 1.29 (0.8-2.1)    | 0.29           | 0.92 (0.63-1.35) | 0.68          |
| <b>AQP10</b> | 1555338_s_at | RFS  | 0.41 (0.13-1.3)   | 0.12          | 0.83 (0.5-1.4)    | 0.49           | 0.87 (0.64-1.19) | 0.4           |
|              |              | OS   | 0.6 (0.05-6.69)   | 0.68          | 1.84 (0.56-6.13)  | 0.31           | 1.57 (0.94-2.62) | 0.081         |
|              |              | DMFS |                   |               | 0.45 (0.14-1.44)  | 0.17           | 0.96 (0.54-1.7)  | 0.89          |
|              |              | PPS  |                   |               |                   |                | 2.67 (1.45-4.92) | <b>0.0011</b> |
| <b>AQP11</b> | 229526_at    | RFS  | 0.72 (0.25-2.08)  | 0.54          | 0.95 (0.57-1.58)  | 0.85           | 0.93 (0.68-1.27) | 0.65          |
|              |              | OS   | 1.58 (0.14-18.29) | 0.7           | 0.64 (0.2-2.03)   | 0.45           | 0.82 (0.49-1.36) | 0.44          |
|              |              | DMFS |                   |               | 0.81 (0.29-2.25)  | 0.69           | 0.92 (0.52-1.63) | 0.77          |
|              |              | PPS  |                   |               |                   |                | 1.41 (0.77-2.57) | 0.26          |

HR, hazard ratio; CI, confidence interval; OS, overall survival; RFS, relapse free survival; DMFS, distant metastasis free survival; PPS, post progression survival.

The histological grades are based on the classical Nottingham Classification System.

All of the data above were obtained from the Kaplan-Meier Plotter database. Some data were empty because sample numbers were too low for meaningful analysis.

The data with statistical significance (P<0.01) were marked in bold text.

**Supplementary Table 6. Survival analyses of the AQP family with different molecular subtypes based on the 2013 St Gallen criteria in breast cancer.**

| Gene | Affymetrix ID | Survival outcome | Basal-like       |                | Lumina A         |                | Lumina B         |             | HER2+            |               |
|------|---------------|------------------|------------------|----------------|------------------|----------------|------------------|-------------|------------------|---------------|
|      |               |                  | HR (95% CI)      | p-value        | HR (95% CI)      | p-value        | HR (95% CI)      | p-value     | HR (95% CI)      | p-value       |
| AQP0 | 220863_at     | RFS              | 0.78 (0.61-1.01) | 0.057          | 0.81 (0.68-0.96) | 0.013          | 0.78 (0.65-0.95) | 0.013       | 0.66 (0.45-0.97) | 0.034         |
|      |               | OS               | 1.01 (0.61-1.65) | 0.98           | 0.97 (0.68-1.38) | 0.87           | 1.17 (0.81-1.69) | 0.41        | 1.32 (0.69-2.53) | 0.4           |
|      |               | DMFS             | 1.34 (0.8-2.24)  | 0.26           | 1 (0.75-1.33)    | 0.99           | 1.17 (0.82-1.66) | 0.38        | 0.75 (0.4-1.4)   | 0.36          |
|      |               | PPS              | 1.32 (0.74-2.36) | 0.35           | 1.11 (0.76-1.64) | 0.59           | 1.08 (0.7-1.65)  | 0.73        | 1.17 (0.56-2.46) | 0.68          |
| AQP1 | 207542_s_at   | RFS              | 0.85 (0.66-1.09) | 0.2            | 0.69 (0.58-0.82) | 2.6e-05        | 0.8 (0.66-0.97)  | 0.025       | 0.69 (0.47-1.01) | 0.056         |
|      |               | OS               | 0.98 (0.6-1.6)   | 0.92           | 0.61 (0.43-0.88) | <b>0.0066</b>  | 0.99 (0.68-1.43) | 0.95        | 0.56 (0.29-1.08) | 0.078         |
|      |               | DMFS             | 1.23 (0.74-2.04) | 0.43           | 0.82 (0.61-1.09) | 0.16           | 0.98 (0.69-1.39) | 0.9         | 0.8 (0.43-1.49)  | 0.48          |
|      |               | PPS              | 1.19 (0.66-2.14) | 0.56           | 0.79 (0.54-1.17) | 0.24           | 1.17 (0.76-1.79) | 0.48        | 1.17 (0.55-2.48) | 0.68          |
|      | 209047_at     | RFS              | 0.94 (0.73-1.21) | 0.65           | 0.66 (0.55-0.78) | <b>1.5e-06</b> | 0.78 (0.64-0.94) | <b>0.01</b> | 1.02 (0.7-1.5)   | 0.91          |
|      |               | OS               | 0.89 (0.54-1.45) | 0.63           | 0.63 (0.44-0.9)  | 0.01           | 0.72 (0.5-1.05)  | 0.083       | 0.77 (0.4-1.47)  | 0.43          |
|      |               | DMFS             | 0.91 (0.55-1.51) | 0.71           | 0.77 (0.58-1.03) | 0.081          | 0.98 (0.69-1.39) | 0.89        | 1.37 (0.73-2.57) | 0.32          |
|      |               | PPS              | 1.17 (0.65-2.1)  | 0.59           | 0.9 (0.61-1.33)  | 0.61           | 1 (0.65-1.53)    | 0.99        | 1.03 (0.49-2.19) | 0.93          |
| AQP2 | 206672_at     | RFS              | 0.68 (0.52-0.87) | <b>0.0024</b>  | 0.66 (0.56-0.78) | <b>1.9e-06</b> | 0.78 (0.65-0.95) | 0.012       | 0.55 (0.37-0.81) | <b>0.0024</b> |
|      |               | OS               | 1.25 (0.75-2.06) | 0.39           | 0.76 (0.54-1.09) | 0.13           | 1.17 (0.8-1.71)  | 0.042       | 1.12 (0.59-2.14) | 0.73          |
|      |               | DMFS             | 1.06 (0.63-1.76) | 0.84           | 0.96 (0.72-1.28) | 0.77           | 1.31 (0.92-1.86) | 0.13        | 0.89 (0.48-1.66) | 0.72          |
|      |               | PPS              | 1.36 (0.75-2.43) | 0.31           | 0.81 (0.55-1.19) | 0.29           | 1.14 (0.74-1.76) | 0.55        | 1.67 (0.78-3.54) | 0.18          |
|      | 236630_at     | RFS              | 0.75 (0.54-1.04) | 0.08           | 0.92 (0.72-1.18) | 0.53           | 1.13 (0.83-1.54) | 0.43        | 1.19 (0.75-1.87) | 0.46          |
|      |               | OS               | 1.13 (0.6-2.13)  | 0.71           | 1.28 (0.77-2.12) | 0.33           | 1.64 (0.83-3.26) | 0.15        | 1.09 (0.5-2.38)  | 0.84          |
|      |               | DMFS             | 0.96 (0.48-1.95) | 0.92           | 1.81 (1.03-3.16) | 0.035          | 1.86 (0.95-3.64) | 0.066       | 1.67 (0.79-3.54) | 0.17          |
|      |               | PPS              | 1.22 (0.52-2.85) | 0.65           | 0.96 (0.54-1.7)  | 0.89           | 0.9 (0.43-1.88)  | 0.78        | 1.65 (0.71-3.87) | 0.24          |
|      | 240285_at     | RFS              | 0.71 (0.51-0.99) | 0.04           | 0.85 (0.67-1.1)  | 0.21           | 0.83 (0.61-1.14) | 0.25        | 0.68 (0.42-1.09) | 0.11          |
|      |               | OS               | 1.02 (0.54-1.94) | 0.94           | 0.91 (0.55-1.52) | 0.72           | 1.09 (0.55-2.14) | 0.8         | 1.93 (0.88-4.26) | 0.096         |
|      |               | DMFS             | 0.5 (0.24-1.05)  | 0.061          | 0.63 (0.36-1.1)  | 0.1            | 0.62 (0.32-1.23) | 0.17        | 0.61 (0.28-1.32) | 0.2           |
|      |               | PPS              | 0.93 (0.4-2.19)  | 0.88           | 0.64 (0.36-1.15) | 0.13           | 1.08 (0.52-2.26) | 0.84        | 3.25 (1.35-7.81) | <b>0.0057</b> |
| AQP3 | 203747_at     | RFS              | 0.94 (0.73-1.21) | 0.65           | 0.78 (0.66-0.93) | <b>0.0047</b>  | 0.84 (0.69-1.02) | 0.077       | 1.28 (0.87-1.88) | 0.21          |
|      |               | OS               | 0.9 (0.55-1.47)  | 0.67           | 1.03 (0.73-1.47) | 0.86           | 1.46 (1-2.12)    | 0.048       | 1.54 (0.8-2.96)  | 0.2           |
|      |               | DMFS             | 1 (0.6-1.65)     | 0.99           | 0.97 (0.72-1.29) | 0.82           | 1.08 (0.76-1.54) | 0.66        | 1.98 (1.03-3.79) | 0.037         |
|      |               | PPS              | 0.63 (0.35-1.14) | 0.12           | 1.06 (0.72-1.56) | 0.78           | 1.1 (0.72-1.69)  | 0.66        | 1.9 (0.89-4.06)  | 0.091         |
|      | 39248_at      | RFS              | 1.41 (1.09-1.82) | <b>0.0076</b>  | 1.11 (0.94-1.32) | 0.21           | 1.16 (0.96-1.41) | 0.13        | 1.8 (1.22-2.68)  | <b>0.0029</b> |
|      |               | OS               | 1.27 (0.77-2.01) | 0.35           | 1.15 (0.81-1.64) | 0.43           | 1.11 (0.77-1.61) | 0.58        | 1.42 (0.74-2.73) | 0.28          |
|      |               | DMFS             | 1.28 (0.77-2.13) | 0.34           | 1.08 (0.81-1.44) | 0.59           | 1.25 (0.88-1.77) | 0.22        | 1.65 (0.88-3.11) | 0.12          |
|      |               | PPS              | 0.9 (0.5-1.62)   | 0.73           | 1.41 (0.96-2.08) | 0.082          | 1.24 (0.81-1.9)  | 0.33        | 2.94 (1.35-6.4)  | <b>0.0048</b> |
|      | 39249_at      | RFS              | 1.59 (1.23-2.06) | <b>0.00032</b> | 1.02 (0.86-1.21) | 0.81           | 1.03 (0.85-1.24) | 0.78        | 1.42 (0.97-2.09) | 0.073         |

|             |             |      |                  |                |                  |                |                  |                |                  |       |
|-------------|-------------|------|------------------|----------------|------------------|----------------|------------------|----------------|------------------|-------|
|             |             | OS   | 1.3 (0.79-2.13)  | 0.29           | 0.98 (0.69-1.4)  | 0.92           | 1.17 (0.81-1.7)  | 0.4            | 1.2 (0.63-2.3)   | 0.57  |
|             |             | DMFS | 1.31 (0.79-2.17) | 0.3            | 1.05 (0.79-1.4)  | 0.75           | 1.12 (0.79-1.59) | 0.53           | 1.33 (0.71-2.5)  | 0.37  |
|             |             | PPS  | 0.85 (0.48-1.54) | 0.6            | 1.15 (0.78-1.69) | 0.48           | 1.23 (0.8-1.89)  | 0.34           | 1.76 (0.83-3.74) | 0.13  |
| <b>AQP4</b> | 210066_s_at | RFS  | 1.01 (0.78-1.29) | 0.97           | 1.1 (0.93-1.31)  | 0.25           | 0.87 (0.72-1.06) | 0.17           | 1.09 (0.74-1.59) | 0.68  |
|             |             | OS   | 1.57 (0.96-2.57) | 0.073          | 1.09 (0.77-1.55) | 0.63           | 0.81 (0.56-1.18) | 0.28           | 0.71 (0.37-1.37) | 0.31  |
|             |             | DMFS | 1.16 (0.7-1.93)  | 0.56           | 1.1 (0.82-1.46)  | 0.53           | 0.84 (0.59-1.2)  | 0.33           | 1.12 (0.6-2.09)  | 0.72  |
|             |             | PPS  | 1.64 (0.9-2.97)  | 0.1            | 0.95 (0.64-1.4)  | 0.79           | 1.06 (0.69-1.64) | 0.79           | 0.6 (0.28-1.28)  | 0.18  |
|             | 210067_at   | RFS  | 0.93 (0.72-1.2)  | 0.58           | 0.91 (0.77-1.08) | 0.28           | 0.67 (0.55-0.81) | <b>5e-05</b>   | 0.8 (0.54-1.18)  | 0.25  |
|             |             | OS   | 1.14 (0.7-1.86)  | 0.6            | 1.03 (0.73-1.47) | 0.85           | 0.95 (0.64-1.39) | 0.78           | 0.98 (0.51-1.87) | 0.94  |
|             |             | DMFS | 0.85 (0.51-1.42) | 0.54           | 1.11 (0.83-1.47) | 0.5            | 0.74 (0.52-1.07) | 0.1            | 0.66 (0.35-1.25) | 0.2   |
|             |             | PPS  | 1.43 (0.8-2.56)  | 0.22           | 1.07 (0.72-1.59) | 0.73           | 1.11 (0.72-1.72) | 0.63           | 1.36 (0.65-2.86) | 0.42  |
|             | 210068_s_at | RFS  | 0.95 (0.73-1.22) | 0.66           | 0.82 (0.69-0.98) | 0.026          | 0.89 (0.74-1.08) | 0.24           | 0.97 (0.66-1.42) | 0.86  |
|             |             | OS   | 1.09 (0.66-1.78) | 0.74           | 0.84 (0.59-1.2)  | 0.33           | 1.28 (0.88-1.85) | 0.2            | 1.4 (0.73-2.69)  | 0.31  |
|             |             | DMFS | 0.93 (0.56-1.54) | 0.77           | 1 (0.75-1.34)    | 0.99           | 1.57 (1.1-2.24)  | 0.011          | 1.14 (0.61-2.13) | 0.67  |
|             |             | PPS  | 0.96 (0.53-1.73) | 0.89           | 0.78 (0.53-1.15) | 0.21           | 1.32 (0.86-2.03) | 0.2            | 2.09 (0.97-4.51) | 0.055 |
|             | 210906_x_at | RFS  | 0.92 (0.71-1.18) | 0.51           | 0.84 (0.71-1)    | 0.052          | 0.8 (0.66-0.98)  | 0.027          | 0.67 (0.46-1)    | 0.047 |
|             |             | OS   | 1.51 (0.92-2.5)  | 0.1            | 0.79 (0.55-1.12) | 0.19           | 1.26 (0.87-1.83) | 0.22           | 0.94 (0.49-1.81) | 0.86  |
|             |             | DMFS | 1.27 (0.77-2.12) | 0.35           | 0.76 (0.57-1.01) | 0.06           | 1.24 (0.88-1.77) | 0.22           | 0.78 (0.42-1.47) | 0.45  |
|             |             | PPS  | 1.22 (0.68-2.18) | 0.5            | 0.8 (0.54-1.18)  | 0.27           | 1 (0.65-1.53)    | 1              | 1.54 (0.72-3.27) | 0.26  |
|             | 226228_at   | RFS  | 0.84 (0.61-1.17) | 0.3            | 1.13 (0.89-1.45) | 0.31           | 0.63 (0.46-0.86) | <b>0.0036</b>  | 0.78 (0.49-1.23) | 0.28  |
|             |             | OS   | 1.2 (0.63-2.27)  | 0.58           | 1.58 (0.95-2.63) | 0.078          | 0.88 (0.45-1.73) | 0.71           | 1.94 (0.86-4.39) | 0.11  |
|             |             | DMFS | 0.78 (0.38-1.59) | 0.49           | 1.28 (0.74-2.22) | 0.37           | 0.61 (0.31-1.2)  | 0.15           | 0.87 (0.41-1.84) | 0.72  |
|             |             | PPS  | 1.14 (0.48-2.69) | 0.76           | 1.74 (0.98-3.1)  | 0.056          | 1.26 (0.6-2.63)  | 0.54           | 2.93 (1.16-7.4)  | 0.018 |
| <b>AQP5</b> | 213611_at   | RFS  | 1.02 (0.8-1.32)  | 0.86           | 0.8 (0.68-0.95)  | 0.013          | 0.87 (0.72-1.06) | 0.16           | 0.81 (0.55-1.19) | 0.29  |
|             |             | OS   | 1.37 (0.83-2.25) | 0.21           | 0.92 (0.64-1.31) | 0.63           | 0.93 (0.64-1.36) | 0.72           | 0.97 (0.51-1.84) | 0.92  |
|             |             | DMFS | 0.99 (0.59-1.64) | 0.96           | 0.85 (0.64-1.14) | 0.28           | 1.15 (0.81-1.64) | 0.43           | 0.81 (0.43-1.52) | 0.52  |
|             |             | PPS  | 1.57 (0.87-2.81) | 0.13           | 0.83 (0.56-1.22) | 0.35           | 0.98 (0.64-1.51) | 0.93           | 1.41 (0.66-3.01) | 0.37  |
| <b>AQP6</b> | 208435_s_at | RFS  | 0.8 (0.62-1.03)  | 0.088          | 0.84 (0.71-1)    | 0.05           | 0.83 (0.68-1)    | 0.051          | 0.79 (0.54-1.17) | 0.24  |
|             |             | OS   | 1.26 (0.77-2.06) | 0.36           | 1.51 (0.81-1.63) | 0.45           | 1.26 (0.87-1.83) | 0.22           | 0.88 (0.46-1.68) | 0.7   |
|             |             | DMFS | 1.55 (0.93-2.6)  | 0.092          | 1.07 (0.81-1.43) | 0.63           | 1.29 (0.91-1.84) | 0.15           | 0.9 (0.48-1.68)  | 0.74  |
|             |             | PPS  | 1.28 (0.71-2.29) | 0.41           | 1.06 (0.72-1.56) | 0.78           | 0.93 (0.6-1.42)  | 0.72           | 0.76 (0.36-1.61) | 0.47  |
|             | 216219_at   | RFS  | 0.67 (0.52-0.87) | <b>0.0023</b>  | 0.77 (0.65-0.91) | <b>0.0023</b>  | 0.87 (0.72-1.06) | 0.17           | 0.65 (0.44-0.95) | 0.026 |
|             |             | OS   | 0.81 (0.5-1.34)  | 0.42           | 0.92 (0.65-1.31) | 0.65           | 0.9 (0.62-1.3)   | 0.56           | 0.92 (0.48-1.75) | 0.8   |
|             |             | DMFS | 0.58 (0.35-0.98) | 0.04           | 1.09 (0.82-1.45) | 0.56           | 1.91 (1.33-2.74) | <b>0.00035</b> | 0.87 (0.47-1.63) | 0.67  |
|             |             | PPS  | 1.17 (0.65-2.11) | 0.61           | 1 (0.67-1.48)    | 1              | 0.94 (0.61-1.44) | 0.77           | 1.04 (0.49-2.18) | 0.92  |
| <b>AQP7</b> | 206955_at   | RFS  | 1.05 (0.82-1.35) | 0.69           | 0.81 (0.68-0.96) | 0.016          | 1.05 (0.86-1.27) | 0.65           | 0.98 (0.67-1.44) | 0.94  |
|             |             | OS   | 1.64 (1-2.71)    | 0.049          | 0.67 (0.47-0.96) | 0.028          | 0.78 (0.54-1.13) | 0.19           | 1.57 (0.81-3.02) | 0.18  |
|             |             | DMFS | 1.5 (0.89-2.5)   | 0.12           | 0.96 (0.72-1.28) | 0.77           | 0.81 (0.57-1.15) | 0.24           | 1.66 (0.88-3.13) | 0.11  |
|             |             | PPS  | 1.03 (0.57-1.84) | 0.93           | 0.93 (0.63-1.37) | 0.71           | 1.03 (0.67-1.58) | 0.89           | 2.39 (1.09-5.23) | 0.026 |
| <b>AQP8</b> | 206784_at   | RFS  | 0.63 (0.49-0.82) | <b>0.00038</b> | 0.83 (0.7-0.98)  | 0.027          | 0.77 (0.63-0.93) | <b>0.0064</b>  | 0.65 (0.44-0.95) | 0.027 |
|             |             | OS   | 0.82 (0.5-1.34)  | 0.43           | 0.8 (0.56-1.14)  | 0.22           | 1.04 (0.72-1.51) | 0.84           | 0.91 (0.48-1.74) | 0.78  |
|             |             | DMFS | 0.75 (0.45-1.26) | 0.28           | 1.1 (0.83-1.47)  | 0.5            | 1.27 (0.89-1.81) | 0.18           | 0.81 (0.44-1.52) | 0.52  |
|             |             | PPS  | 1.08 (0.6-1.93)  | 0.8            | 0.64 (0.43-0.95) | 0.027          | 0.81 (0.53-1.25) | 0.34           | 0.87 (0.41-1.83) | 0.71  |
| <b>AQP9</b> | 205568_at   | RFS  | 0.93 (0.72-1.19) | 0.56           | 1.77 (1.49-2.11) | <b>5.7e-11</b> | 1.37 (1.13-1.66) | <b>0.0013</b>  | 0.69 (0.47-1.01) | 0.057 |

|              |              |      |                  |               |                  |              |                  |       |                  |               |
|--------------|--------------|------|------------------|---------------|------------------|--------------|------------------|-------|------------------|---------------|
|              |              | OS   | 0.79 (0.48-1.3)  | 0.35          | 1.48 (1.04-2.11) | 0.029        | 1.4 (0.96-2.04)  | 0.079 | 0.97 (0.51-1.86) | 0.93          |
|              |              | DMFS | 0.95 (0.57-1.57) | 0.83          | 1.51 (1.13-2.02) | <b>0.005</b> | 1.16 (0.81-1.64) | 0.42  | 0.69 (0.37-1.3)  | 0.25          |
|              |              | PPS  | 0.77 (0.42-1.39) | 0.38          | 1.49 (1.01-2.2)  | 0.045        | 0.86 (0.56-1.33) | 0.5   | 0.95 (0.45-1.99) | 0.88          |
| <b>AQP10</b> | 1555338_s_at | RFS  | 0.61 (0.44-0.85) | <b>0.0035</b> | 0.86 (0.67-1.1)  | 0.23         | 0.88 (0.64-1.2)  | 0.41  | 1.34 (0.85-2.12) | 0.2           |
|              |              | OS   | 1.25 (0.66-2.37) | 0.49          | 1.25 (0.75-2.07) | 0.39         | 1.28 (0.65-2.51) | 0.47  | 3.38 (1.35-8.47) | <b>0.0058</b> |
|              |              | DMFS | 0.89 (0.44-1.8)  | 0.74          | 0.99 (0.57-1.71) | 0.97         | 1.08 (0.56-2.08) | 0.82  | 1.9 (0.89-4.06)  | 0.093         |
|              |              | PPS  | 2.05 (0.86-4.88) | 0.1           | 1.47 (0.83-2.59) | 0.19         | 0.96 (0.46-2)    | 0.92  | 1.33 (0.57-3.08) | 0.51          |
| <b>AQP11</b> | 229526_at    | RFS  | 0.71 (0.52-0.99) | 0.042         | 0.86 (0.68-1.1)  | 0.24         | 0.8 (0.58-1.08)  | 0.14  | 1.1 (0.7-1.74)   | 0.67          |
|              |              | OS   | 0.87 (0.46-1.64) | 0.66          | 1.01 (0.61-1.66) | 0.98         | 0.78 (0.39-1.52) | 0.46  | 0.99 (0.45-2.17) | 0.98          |
|              |              | DMFS | 0.84 (0.41-1.71) | 0.63          | 0.65 (0.37-1.13) | 0.12         | 1.4 (0.72-2.73)  | 0.31  | 1.51 (0.72-3.19) | 0.27          |
|              |              | PPS  | 0.9 (0.39-2.09)  | 0.81          | 1.23 (0.7-2.14)  | 0.47         | 0.57 (0.27-1.19) | 0.13  | 0.52 (0.22-1.22) | 0.13          |

HR, hazard ratio; CI, confidence interval; OS, overall survival; RFS, relapse free survival; DMFS, distant metastasis free survival; PPS, post progression survival.

All of the data above were obtained from the Kaplan-Meier Plotter database.

The data with statistical significance (P<0.01) were marked in bold text.
